# Supplementary material for: General Rules for Optimal Codon Choice
Source: PLoS Genet. 2009 Jul 10;5(7):e1000556. doi: 10.1371/journal.pgen.1000556 (PMC2700274; doi:10.1371/journal.pgen.1000556)
Supplement: Table S5 — Optimal codons identified in fungi. (0.02 MB XLS) [file pgen.1000556.s006.xls]

## Sheet: Sheet1
Fungi	%GC (intergenic)	Ala	Arg	Asn	Asp	Cys	Gln	Glu	Gly	His	Ile	Leu	Lys	Phe	Pro	Ser	Thr	Tyr	Val
Candida_glabrata_CBS138	38.744	GCC	AGA	AAC	GAC	TGT	CAA	none	GGT	CAC	ATC	TTG	AAG	TTC	CCA	TCC	ACC	TAC	GTC
Cryptococcus_neoformans_var_JEC21	48.5518	GCC	AGG	AAC	GAC	TGT	CAG	GAG	GGC	CAC	ATC	TTG	AAG	TTC	CCC	TCC	ACC	TAC	GTC
Debarymoymyces_hansenii_CBS767	36.2707	GCC	AGA	AAC	GAC	TGT	CAA	GAA	GGT	CAC	ATC	TTG	AAG	TTC	CCA	TCC	ACC	TAC	GTC
Encephalitozoon_cuniculi	47.2987	GCC	AGG	AAC	GAC	TGC	CAG	GAG	GGG	CAC	ATC	CTG	AAG	TTC	CCG	AGC	ACG	TAC	GTG
Eremothecium_gossypii	51.9674	GCG	CGG	AAC	GAC	TGC	CAG	GAG	GGC	CAC	ATC	CTG	AAG	TTC	CCG	AGC	ACG	TAC	GTG
Kluyveromyces_lactis_NRPL_Y-1140	38.815	GCC	AGA	AAC	GAC	TGT	CAA	GAA	GGT	CAC	ATC	TTG	AAG	TTC	CCA	TCC	ACC	TAC	GTC
Pichia_stipitis	41.1198	GCC	AGA	AAC	GAC	TGT	none	GAA	GGT	CAC	ATC	TTG	AAG	TTC	CCT	TCG	ACC	TAC	GTC
Saccharomyces_cerevisiae	38.4213	GCC	AGA	AAC	GAC	TGT	CAA	GAA	GGT	CAC	ATC	TTG	AAG	TTC	CCA	TCC	ACC	TAC	GTC
Schizosaccharomyces_pombe	34.5851	GCC	CGC	AAC	none	none	CAA	GAG	GGT	CAC	ATC	TTG	AAG	TTC	CCC	TCC	ACC	TAC	GTC
Yarrowia_lipolytica_CLIB122	49.0087	GCC	CGA	AAC	GAC	none	CAG	GAG	GGC	CAC	ATC	CTG	AAG	TTC	CCC	TCC	ACC	TAC	GTC
